# Supplementary material for: One-pot hydrothermal synthesis of novel 3D starfish-like δ-MnO2 nanosheets on carbon fiber paper for high-performance supercapacitors
Source: Royal Society of Chemistry journal article supplement (doi:10.1039/c7ra00787f), 2017-01-01
Supplement: c7ra00787f1.pdf [file c7ra00787f1.pdf]

**One-pot hydrothermal synthesis of novel 3D starfish-like  $\delta$ -MnO<sub>2</sub>  
nanosheets on carbon fiber paper for high-performance  
supercapacitor**

Bin Xu,<sup>a</sup> Lin Yu,<sup>\*a</sup> Ming Sun,<sup>a</sup> Fei Ye,<sup>a</sup> Yuanhong Zhong,<sup>a</sup> Gao Cheng,<sup>a</sup> Hui Wang<sup>a</sup> and Yuliang Mai<sup>ab</sup>

<sup>a</sup>Key Laboratory of Clean Chemistry Technology of Guangdong Regular Higher Education Institutions,  
School of Chemical Engineering and Light Industry, Guangdong University of Technology, Guangzhou  
510006, P. R. China. E-mail: [gych@gdut.edu.cn](mailto:gych@gdut.edu.cn)

<sup>b</sup>Petrochemical Research Institute of Guangdong Province, Guangzhou 510006, P. R. China

<sup>c</sup>Guangdong Research Institute of Petrochemical and Fine Chemical Engineering, Guangdong  
Provincial Key Laboratory of Industrial Surfactant, Guangzhou 510006, P. R. China

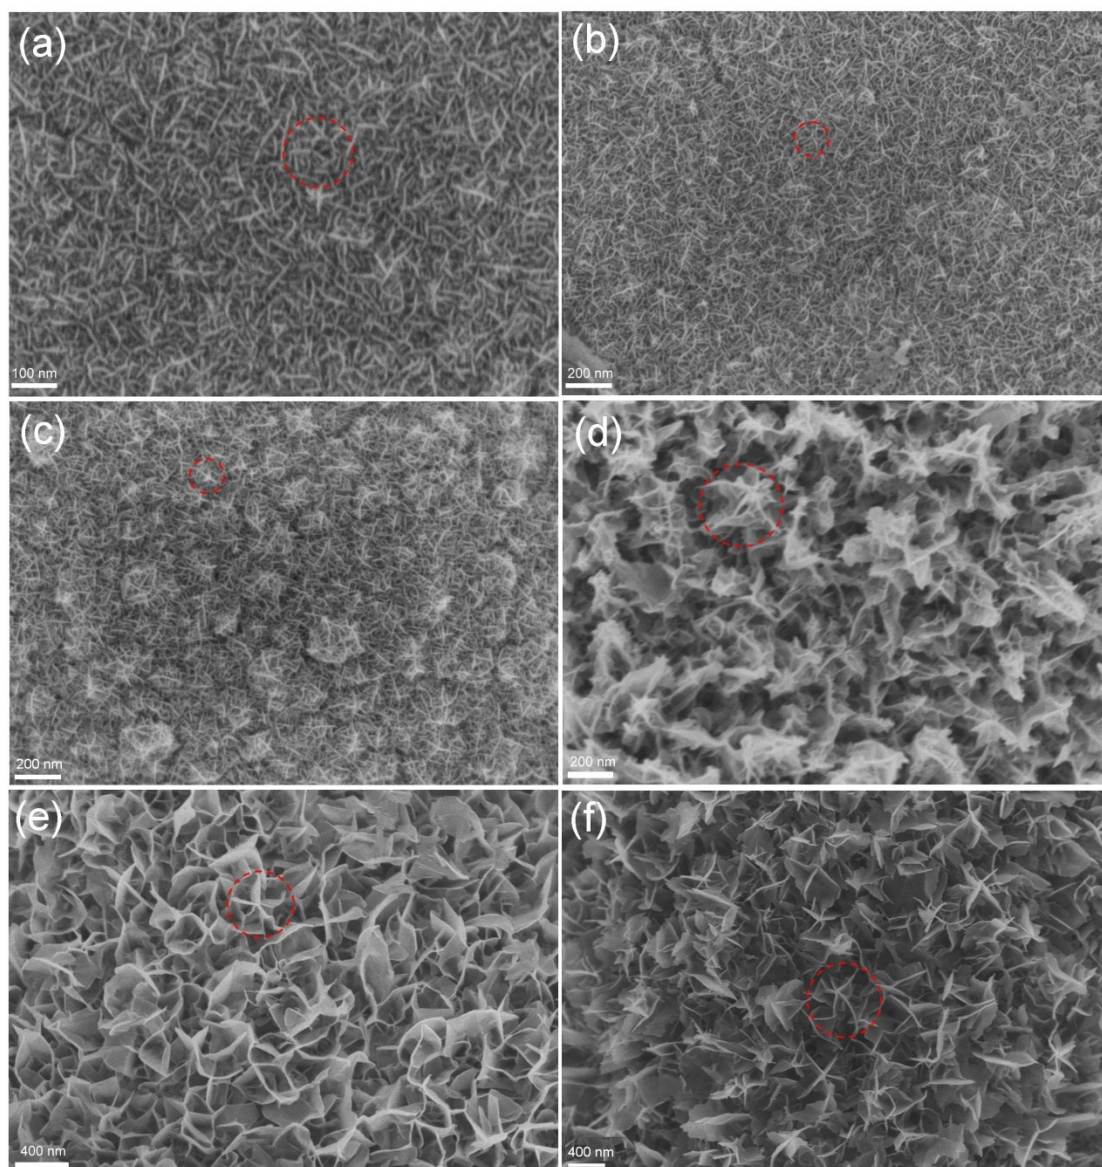

Fig. S1 FESEM images of the starfish-like  $\delta$ -MnO<sub>2</sub> with different hydrothermal time at 120 °C; (a) 1 h, (b) 3 h, (c) 6 h, (d) 12 h, (e) 18 h, (f) 24 h.
